# Supplementary material
Source: Frontiers journal article supplement (https://www.frontiersin.org/articles/61993)
Supplement: Data_Sheet_3.PDF [file Data_Sheet_3.PDF]

## Histological type of ovarian cancer

**1. Hierarchical clustering:** Dendrogram shows the relations between samples of different histological type. The majority of clear cell and endometrioid tumors are clustered in a separate branch on the left side of dendrogram. Serous and undifferentiated tumors represent the majority in the right branch. Heat map shows relative intensity of genes expression. No specific gene expression pattern is visible corresponding to the given histological type.

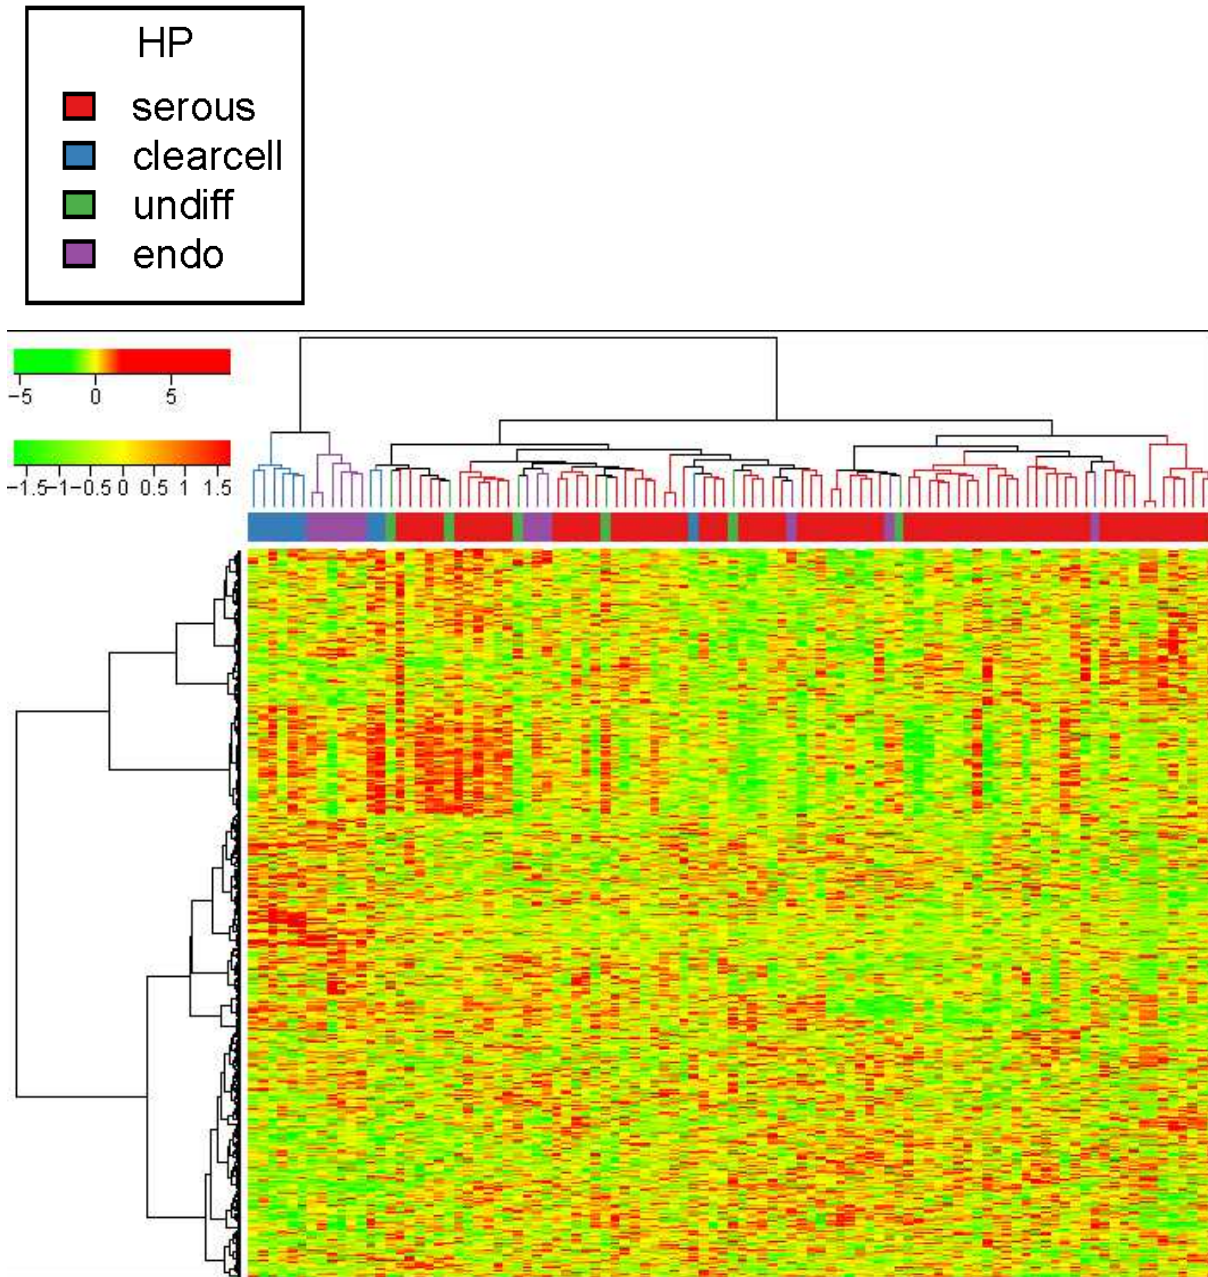

**2. Signaling pathways** (according to Biocarta repository) with significantly changed gene expression between ovarian cancers of distinct histology. Hotelling test was used to analyze annotated genes selected by ANOVA in comparison of 4 histological types of ovarian cancer (serous, undifferentiated, clear cell and endometrioid).

|    | Signaling pathway (Biocarta) | Signaling pathway name                                                                         | p-value   |
|----|------------------------------|------------------------------------------------------------------------------------------------|-----------|
| 1  | h_nuclearRsPathway           | <a href="#">Nuclear Receptors in Lipid Metabolism and Toxicity</a>                             | p < 1e-07 |
| 2  | h_EfpPathway                 | <a href="#">Estrogen-responsive protein Efp controls cell cycle and breast tumors growth</a>   | p < 1e-07 |
| 3  | h_mta3Pathway                | <a href="#">Downregulated of MTA-3 in ER-negative Breast Tumors</a>                            | p < 1e-07 |
| 4  | h_fxrPathway                 | <a href="#">FXR and LXR Regulation of Cholesterol Metabolism</a>                               | p < 1e-07 |
| 5  | h_pelp1Pathway               | <a href="#">Pelp1 Modulation of Estrogen Receptor Activity</a>                                 | p < 1e-07 |
| 6  | h_tidPathway                 | <a href="#">Chaperones modulate interferon Signaling Pathway</a>                               | p < 1e-07 |
| 7  | h_her2Pathway                | <a href="#">Role of ERBB2 in Signal Transduction and Oncology</a>                              | p < 1e-07 |
| 8  | h_tertpathway                | <a href="#">Overview of telomerase protein component gene hTert Transcriptional Regulation</a> | p < 1e-07 |
| 9  | h_HivnefPathway              | <a href="#">HIV-I Nef: negative effector of Fas and TNF</a>                                    | p < 1e-07 |
| 10 | h_carm-erPathway             | <a href="#">CARM1 and Regulation of the Estrogen Receptor</a>                                  | p < 1e-07 |

|    |                        |                                                                                                         |           |
|----|------------------------|---------------------------------------------------------------------------------------------------------|-----------|
| 11 | h_il10Pathway          | <a href="#">IL-10 Anti-inflammatory Signaling Pathway</a>                                               | p < 1e-07 |
| 12 | h_no2il12Pathway       | <a href="#">NO2-dependent IL 12 Pathway in NK cells</a>                                                 | p < 1e-07 |
| 13 | h_mrpPathway           | <a href="#">Multi-Drug Resistance Factors</a>                                                           | p < 1e-07 |
| 14 | h_metPathway           | <a href="#">Signaling of Hepatocyte Growth Factor Receptor</a>                                          | p < 1e-07 |
| 15 | h_methioninepathway    | <a href="#">Catabolic Pathways for Methionine, Isoleucine, Threonine and Valine</a>                     | p < 1e-07 |
| 16 | h_gsk3Pathway          | <a href="#">Inactivation of Gsk3 by AKT causes accumulation of b-catenin in Alveolar Macrophages</a>    | p < 1e-07 |
| 17 | h_cblPathway           | <a href="#">CBL mediated ligand-induced downregulation of EGF receptors</a>                             | p < 1e-07 |
| 18 | h_hdacPathway          | <a href="#">Control of skeletal myogenesis by HDAC &amp; calcium/calmodulin-dependent kinase (CaMK)</a> | p < 1e-07 |
| 19 | h_deathPathway         | <a href="#">Induction of apoptosis through DR3 and DR4/5 Death Receptors</a>                            | p < 1e-07 |
| 20 | h_prc2Pathway          | <a href="#">The PRC2 Complex Sets Long-term Gene Silencing Through Modification of Histone Tails</a>    | p < 1e-07 |
| 21 | h_il1rPathway          | <a href="#">Signal transduction through IL1R</a>                                                        | p < 1e-07 |
| 22 | h_bArrestinPathway     | <a href="#">β-arrestins in GPCR Desensitization</a>                                                     | p < 1e-07 |
| 23 | h_mPRPathway           | <a href="#">How Progesterone Initiates the Oocyte Maturation</a>                                        | p < 1e-07 |
| 24 | h_mitochondriaPathway  | <a href="#">Role of Mitochondria in Apoptotic Signaling</a>                                             | p < 1e-07 |
| 25 | h_bArrestin-srcPathway | <a href="#">Roles of β-arrestin-dependent Recruitment of Src Kinases in GPCR Signaling</a>              | p < 1e-07 |
| 26 | h_crebPathway          | <a href="#">Transcription factor CREB and its extracellular signals</a>                                 | p < 1e-07 |
| 27 | h_barr-mapkPathway     | <a href="#">Role of β-arrestins in the activation and targeting of MAP kinases</a>                      | p < 1e-07 |
| 28 | h_p53hypoxiaPathway    | <a href="#">Hypoxia and p53 in the Cardiovascular system</a>                                            | p < 1e-07 |
| 29 | h_il6Pathway           | <a href="#">IL 6 signaling pathway</a>                                                                  | p < 1e-07 |
| 30 | h_extrinsicPathway     | <a href="#">Extrinsic Prothrombin Activation Pathway</a>                                                | p < 1e-07 |
| 31 | h_ctbp1Pathway         | <a href="#">SUMOylation as a mechanism to modulate CtBP-dependent gene responses</a>                    | p < 1e-07 |
| 32 | h_tffPathway           | <a href="#">Treff Factors Initiate Mucosal Healing</a>                                                  | p < 1e-07 |
| 33 | h_prionPathway         | <a href="#">Prion Pathway</a>                                                                           | p < 1e-07 |
| 34 | h_erythPathway         | <a href="#">Erythrocyte Differentiation Pathway</a>                                                     | p < 1e-07 |
| 35 | h_freePathway          | <a href="#">Free Radical Induced Apoptosis</a>                                                          | p < 1e-07 |
| 36 | h_ghrelinPathway       | <a href="#">Ghrelin: Regulation of Food Intake and Energy Homeostasis</a>                               | p < 1e-07 |
| 37 | h_nthiPathway          | <a href="#">NFkB activation by Nontypeable Hemophilus influenzae</a>                                    | p < 1e-07 |
| 38 | h_LDLpathway           | <a href="#">Low-density lipoprotein (LDL) pathway during atherogenesis</a>                              | p < 1e-07 |
| 39 | h_edg1Pathway          | <a href="#">Phospholipids as signalling intermediaries</a>                                              | p < 1e-07 |
| 40 | h_cpsfPathway          | <a href="#">Polyadenylation of mRNA</a>                                                                 | p < 1e-07 |
| 41 | h_argininecPathway     | <a href="#">Catabolic Pathways for Arginine , Histidine, Glutamate, Glutamine, and Proline</a>          | p < 1e-07 |
| 42 | h_vdrPathway           | <a href="#">Control of Gene Expression by Vitamin D Receptor</a>                                        | p < 1e-07 |
| 43 | h_nos1Pathway          | <a href="#">Nitric Oxide Signaling Pathway</a>                                                          | p < 1e-07 |
| 44 | h_amiPathway           | <a href="#">Acute Myocardial Infarction</a>                                                             | p < 1e-07 |
| 45 | h_aktPathway           | <a href="#">AKT Signaling Pathway</a>                                                                   | p < 1e-07 |
| 46 | h_stemPathway          | <a href="#">Regulation of hematopoiesis by cytokines</a>                                                | p < 1e-07 |
| 47 | h_pparaPathway         | <a href="#">Mechanism of Gene Regulation by Peroxisome Proliferators via PPARα(alpha)</a>               | p < 1e-07 |
| 48 | h_tnfr1Pathway         | <a href="#">TNFR1 Signaling Pathway</a>                                                                 | p < 1e-07 |
| 49 | h_g1Pathway            | <a href="#">Cell Cycle: G1/S Check Point</a>                                                            | p < 1e-07 |
| 50 | h_pitx2Pathway         | <a href="#">Multi-step Regulation of Transcription by Pitx2</a>                                         | p < 1e-07 |
| 51 | h_hcmvPathway          | <a href="#">Human Cytomegalovirus and Map Kinase Pathways</a>                                           | p < 1e-07 |
| 52 | h_ranbp2Pathway        | <a href="#">Sumoylation by RanBP2 Regulates Transcriptional Repression</a>                              | p < 1e-07 |
| 53 | h_rac1Pathway          | <a href="#">Rac 1 cell motility signaling pathway</a>                                                   | p < 1e-07 |
| 54 | h_nfatPathway          | <a href="#">NFAT and Hypertrophy of the heart (Transcription in the broken heart)</a>                   | p < 1e-07 |
| 55 | h_sppaPathway          | <a href="#">Aspirin Blocks Signaling Pathway Involved in Platelet Activation</a>                        | p < 1e-07 |
| 56 | h_keratinocytePathway  | <a href="#">Keratinocyte Differentiation</a>                                                            | p < 1e-07 |
| 57 | h_melanocytepathway    | <a href="#">Melanocyte Development and Pigmentation Pathway</a>                                         | p < 1e-07 |
| 58 | h_fasPathway           | <a href="#">FAS signaling pathway ( CD95 )</a>                                                          | p < 1e-07 |
| 59 | h_eicosanoidPathway    | <a href="#">Eicosanoid Metabolism</a>                                                                   | p < 1e-07 |
| 60 | h_tgfbPathway          | <a href="#">TGF beta signaling pathway</a>                                                              | p < 1e-07 |
| 61 | h_ndkDynaminPathway    | <a href="#">Endocytotic role of NDK, Phosphins and Dynamin</a>                                          | p < 1e-07 |
| 62 | h_IL12Pathway          | <a href="#">IL12 and Stat4 Dependent Signaling Pathway in Th1 Development</a>                           | p < 1e-07 |
| 63 | h_ucalpainPathway      | <a href="#">uCalpain and friends in Cell spread</a>                                                     | p < 1e-07 |
| 64 | h_alkPathway           | <a href="#">ALK in cardiac myocytes</a>                                                                 | p < 1e-07 |
| 65 | h_bcrPathway           | <a href="#">BCR Signaling Pathway</a>                                                                   | p < 1e-07 |
| 66 | h_raccPathway          | <a href="#">Ion Channels and Their Functional Role in Vascular Endothelium</a>                          | p < 1e-07 |
| 67 | h_gpcrPathway          | <a href="#">Signaling Pathway from G-Protein Families</a>                                               | p < 1e-07 |
| 68 | h_41bbPathway          | <a href="#">The 4-1BB-dependent immune response</a>                                                     | p < 1e-07 |
| 69 | h_fMLPpathway          | <a href="#">fMLP induced chemokine gene expression in HMC-1 cells</a>                                   | p < 1e-07 |
| 70 | h_stressPathway        | <a href="#">TNF/Stress Related Signaling</a>                                                            | p < 1e-07 |
| 71 | h_arenf2Pathway        | <a href="#">Oxidative Stress Induced Gene Expression Via Nrf2</a>                                       | p < 1e-07 |
| 72 | h_nktPathway           | <a href="#">Selective expression of chemokine receptors during T-cell polarization</a>                  | p < 1e-07 |
| 73 | h_soddPathway          | <a href="#">SODD/TNFR1 Signaling Pathway</a>                                                            | p < 1e-07 |
| 74 | h_cremPathway          | <a href="#">Regulation of Spermatogenesis by CREM</a>                                                   | p < 1e-07 |

|     |                        |                                                                                                                                                                             |           |
|-----|------------------------|-----------------------------------------------------------------------------------------------------------------------------------------------------------------------------|-----------|
| 75  | h_caspasePathway       | <a href="#">Caspase Cascade in Apoptosis</a>                                                                                                                                | p < 1e-07 |
| 76  | h_biopeptidesPathway   | <a href="#">Bioactive Peptide Induced Signaling Pathway</a>                                                                                                                 | p < 1e-07 |
| 77  | h_appPathway           | <a href="#">Generation of amyloid b-peptide by PS1</a>                                                                                                                      | 1e-07     |
| 78  | h_etsPathway           | <a href="#">METS affect on Macrophage Differentiation</a>                                                                                                                   | 1e-07     |
| 79  | h_gsPathway            | <a href="#">Activation of cAMP-dependent protein kinase, PKA</a>                                                                                                            | 1e-07     |
| 80  | h_tollPathway          | <a href="#">Toll-Like Receptor Pathway</a>                                                                                                                                  | 2e-07     |
| 81  | h_mbdPathway           | <a href="#">Mechanisms of transcriptional repression by DNA methylation</a>                                                                                                 | 2e-07     |
| 82  | h_rabPathway           | <a href="#">Rab GTPases Mark Targets In The Endocytotic Machinery</a>                                                                                                       | 2e-07     |
| 83  | h_eponfkbPathway       | <a href="#">Erythropoietin mediated neuroprotection through NF-kB</a>                                                                                                       | 2e-07     |
| 84  | h_chrebpPathway        | <a href="#">ChREBP regulation by carbohydrates and cAMP</a>                                                                                                                 | 2e-07     |
| 85  | h_hesPathway           | <a href="#">Segmentation Clock</a>                                                                                                                                          | 2e-07     |
| 86  | h_p38mapkPathway       | <a href="#">p38 MAPK Signaling Pathway</a>                                                                                                                                  | 3e-07     |
| 87  | h_g2Pathway            | <a href="#">Cell Cycle: G2/M Checkpoint</a>                                                                                                                                 | 3e-07     |
| 88  | h_cellcyclePathway     | <a href="#">Cyclins and Cell Cycle Regulation</a>                                                                                                                           | 3e-07     |
| 89  | h_monocytePathway      | <a href="#">Monocyte and its Surface Molecules</a>                                                                                                                          | 3e-07     |
| 90  | h_Par1Pathway          | <a href="#">Thrombin signaling and protease-activated receptors</a>                                                                                                         | 4e-07     |
| 91  | h_ranPathway           | <a href="#">Cycling of Ran in nucleocytoplasmic transport</a>                                                                                                               | 5e-07     |
| 92  | h_lymphocytePathway    | <a href="#">Adhesion Molecules on Lymphocyte</a>                                                                                                                            | 6e-07     |
| 93  | h_p35alzheimersPathway | <a href="#">Deregulation of CDK5 in Alzheimers Disease</a>                                                                                                                  | 6e-07     |
| 94  | h_gabaPathway          | <a href="#">Gamma-aminobutyric Acid Receptor Life Cycle</a>                                                                                                                 | 6e-07     |
| 95  | h_CCR3Pathway          | <a href="#">CCR3 signaling in Eosinophils</a>                                                                                                                               | 6e-07     |
| 96  | h_npcPathway           | <a href="#">Mechanism of Protein Import into the Nucleus</a>                                                                                                                | 7e-07     |
| 97  | h_erkPathway           | <a href="#">Erk1/Erk2 Mapk Signaling pathway</a>                                                                                                                            | 1e-06     |
| 98  | h_cytokinePathway      | <a href="#">Cytokine Network</a>                                                                                                                                            | 1.2e-06   |
| 99  | h_plcdPathway          | <a href="#">Phospholipase C d1 in phospholipid associated cell signaling</a>                                                                                                | 1.2e-06   |
| 100 | h_ppargPathway         | <a href="#">Role of PPAR-gamma Coactivators in Obesity and Thermogenesis</a>                                                                                                | 1.4e-06   |
| 101 | h_SARSpPathway         | <a href="#">SARS Coronavirus Protease</a>                                                                                                                                   | 1.4e-06   |
| 102 | h_igf1rPathway         | <a href="#">Multiple antiapoptotic pathways from IGF-1R signaling lead to BAD phosphorylation</a>                                                                           | 1.5e-06   |
| 103 | h_fibrinolysisPathway  | <a href="#">Fibrinolysis Pathway</a>                                                                                                                                        | 1.5e-06   |
| 104 | h_ahspPathway          | <a href="#">Hemoglobin@</a>                                                                                                                                                 | 1.7e-06   |
| 105 | h_eifPathway           | <a href="#">Eukaryotic protein translation</a>                                                                                                                              | 1.8e-06   |
| 106 | h_ck1Pathway           | <a href="#">Regulation of ck1/cdk5 by type 1 glutamate receptors</a>                                                                                                        | 2e-06     |
| 107 | h_il2Pathway           | <a href="#">IL 2 signaling pathway</a>                                                                                                                                      | 2.3e-06   |
| 108 | h_il2rbPathway         | <a href="#">IL-2 Receptor Beta Chain in T cell Activation</a>                                                                                                               | 2.4e-06   |
| 109 | h_AcetaminophenPathway | <a href="#">Mechanism of Acetaminophen Activity and Toxicity</a>                                                                                                            | 2.7e-06   |
| 110 | h_skp2e2fPathway       | <a href="#">E2F1 Destruction Pathway</a>                                                                                                                                    | 2.9e-06   |
| 111 | h_RacCycDPathway       | <a href="#">Influence of Ras and Rho proteins on G1 to S Transition</a>                                                                                                     | 3.8e-06   |
| 112 | h_integrinPathway      | <a href="#">Integrin Signaling Pathway</a>                                                                                                                                  | 3.9e-06   |
| 113 | h_cxcr4Pathway         | <a href="#">CXCR4 Signaling Pathway</a>                                                                                                                                     | 4.8e-06   |
| 114 | h_rhoPathway           | <a href="#">Rho cell motility signaling pathway</a>                                                                                                                         | 5e-06     |
| 115 | h_cdMacPathway         | <a href="#">Cadmium induces DNA synthesis and proliferation in macrophages</a>                                                                                              | 5e-06     |
| 116 | h_tcytotoxicPathway    | <a href="#">T Cytotoxic Cell Surface Molecules</a>                                                                                                                          | 5.4e-06   |
| 117 | h_insulinPathway       | <a href="#">Insulin Signaling Pathway</a>                                                                                                                                   | 6.2e-06   |
| 118 | h_cdk5Pathway          | <a href="#">Phosphorylation of MEK1 by cdk5/p35 down regulates the MAP kinase pathway</a>                                                                                   | 6.3e-06   |
| 119 | h_thelperPathway       | <a href="#">T Helper Cell Surface Molecules</a>                                                                                                                             | 6.4e-06   |
| 120 | h_ps1Pathway           | <a href="#">Presenilin action in Notch and Wnt signaling</a>                                                                                                                | 6.5e-06   |
| 121 | h_parkinPathway        | <a href="#">Role of Parkin in the Ubiquitin-Proteasomal Pathway</a>                                                                                                         | 7.3e-06   |
| 122 | h_carm1Pathway         | <a href="#">Transcription Regulation by Methyltransferase of CARM1</a>                                                                                                      | 7.3e-06   |
| 123 | h_pdgfPathway          | <a href="#">PDGF Signaling Pathway</a>                                                                                                                                      | 8.5e-06   |
| 124 | h_pyk2Pathway          | <a href="#">Links between Pyk2 and Map Kinases</a>                                                                                                                          | 8.7e-06   |
| 125 | h_longevityPathway     | <a href="#">The IGF-1 Receptor and Longevity</a>                                                                                                                            | 8.7e-06   |
| 126 | h_erk5Pathway          | <a href="#">Role of Erk5 in Neuronal Survival</a>                                                                                                                           | 8.8e-06   |
| 127 | h_badPathway           | <a href="#">Regulation of BAD phosphorylation</a>                                                                                                                           | 9.4e-06   |
| 128 | h_tall1Pathway         | <a href="#">TACI and BCMA stimulation of B cell immune responses.</a>                                                                                                       | 1.14e-05  |
| 129 | h_eif4Pathway          | <a href="#">Regulation of eIF4e and p70 S6 Kinase</a>                                                                                                                       | 1.16e-05  |
| 130 | h_Lis1Pathway          | <a href="#">Lissencephaly gene (LIS1) in neuronal migration and development</a>                                                                                             | 1.19e-05  |
| 131 | h_reelinPathway        | <a href="#">Reelin Signaling Pathway</a>                                                                                                                                    | 1.24e-05  |
| 132 | h_neutrophilPathway    | <a href="#">Neutrophil and Its Surface Molecules</a>                                                                                                                        | 1.5e-05   |
| 133 | h_rarrxrPathway        | <a href="#">Nuclear receptors coordinate the activities of chromatin remodeling complexes and coactivators to facilitate initiation of transcription in carcinoma cells</a> | 1.61e-05  |
| 134 | h_hifPathway           | <a href="#">Hypoxia-Inducible Factor in the Cardiovascular System</a>                                                                                                       | 1.65e-05  |
| 135 | h_fcer1Pathway         | <a href="#">Fc Epsilon Receptor I Signaling in Mast Cells</a>                                                                                                               | 1.72e-05  |
| 136 | h_mef2dPathway         | <a href="#">Role of MEF2D in T-cell Apoptosis</a>                                                                                                                           | 1.9e-05   |
| 137 | h_plcePathway          | <a href="#">Phospholipase C-epsilon pathway</a>                                                                                                                             | 2.2e-05   |
| 138 | h_pmlPathway           | <a href="#">Regulation of transcriptional activity by PML</a>                                                                                                               | 2.21e-05  |
| 139 | h_PDZsPathway          | <a href="#">Synaptic Proteins at the Synaptic Junction</a>                                                                                                                  | 2.35e-05  |
| 140 | h_HuntingtonPathway    | <a href="#">Inhibition of Huntington@</a>                                                                                                                                   | 2.38e-05  |



|     |                       |                                                                                                                          |           |
|-----|-----------------------|--------------------------------------------------------------------------------------------------------------------------|-----------|
| 141 | h_hSWI-SNFpathway     | <a href="#">Chromatin Remodeling by hSWI/SNF ATP-dependent Complexes</a>                                                 | 2.69e-05  |
| 142 | h_agpcrPathway        | <a href="#">Attenuation of GPCR Signaling</a>                                                                            | 3.08e-05  |
| 143 | h_erbB4pathway        | <a href="#">g-Secretase mediated ErbB4 Signaling Pathway</a>                                                             | 3.12e-05  |
| 144 | h_ace2Pathway         | <a href="#">Angiotensin-converting enzyme 2 regulates heart function</a>                                                 | 3.18e-05  |
| 145 | h_ghPathway           | <a href="#">Growth Hormone Signaling Pathway</a>                                                                         | 3.53e-05  |
| 146 | h_dspPathway          | <a href="#">Regulation of MAP Kinase Pathways Through Dual Swoistość Phosphatases</a>                                    | 3.63e-05  |
| 147 | h_tsp1Pathway         | <a href="#">TSP-1 Induced Apoptosis in Microvascular Endothelial Cell</a>                                                | 3.85e-05  |
| 148 | h_il4Pathway          | <a href="#">IL 4 signaling pathway</a>                                                                                   | 3.99e-05  |
| 149 | h_malatePathway       | <a href="#">Malate-aspartate shuttle</a>                                                                                 | 4.26e-05  |
| 150 | h_cftrPathway         | <a href="#">Cystic fibrosis transmembrane conductance regulator (CFTR) and beta 2 adrenergic receptor (b2AR) pathway</a> | 4.95e-05  |
| 151 | h_rnaPathway          | <a href="#">Double Stranded RNA Induced Gene Expression</a>                                                              | 5.73e-05  |
| 152 | h_nkcellsPathway      | <a href="#">Ras-Independent pathway in NK cell-mediated cytotoxicity</a>                                                 | 6e-05     |
| 153 | h_arapPathway         | <a href="#">ADP-Ribosylation Factor</a>                                                                                  | 6.29e-05  |
| 154 | h_no1Pathway          | <a href="#">Actions of Nitric Oxide in the Heart</a>                                                                     | 7.48e-05  |
| 155 | h_fosbPathway         | <a href="#">FOSB gene expression and drug abuse</a>                                                                      | 7.56e-05  |
| 156 | h_mTORPathway         | <a href="#">mTOR Signaling Pathway</a>                                                                                   | 7.68e-05  |
| 157 | h_MITRPathway         | <a href="#">Signal Dependent Regulation of Myogenesis by Corepressor MITR</a>                                            | 8.63e-05  |
| 158 | h_leptinPathway       | <a href="#">Reversal of Insulin Resistance by Leptin</a>                                                                 | 0.0001088 |
| 159 | h_eradPathway         | <a href="#">ER-associated degradation (ERAD) Pathway</a>                                                                 | 0.0001104 |
| 160 | h_wntPathway          | <a href="#">WNT Signaling Pathway</a>                                                                                    | 0.0001108 |
| 161 | h_cell2cellPathway    | <a href="#">Cell to Cell Adhesion Signaling</a>                                                                          | 0.000111  |
| 162 | h_th1th2Pathway       | <a href="#">Th1/Th2 Differentiation</a>                                                                                  | 0.0001113 |
| 163 | h_ceramidePathway     | <a href="#">Ceramide Signaling Pathway</a>                                                                               | 0.0001216 |
| 164 | h_GATA3pathway        | <a href="#">GATA3 participate in activating the Th2 cytokine genes expression</a>                                        | 0.0001313 |
| 165 | h_il17Pathway         | <a href="#">IL 17 Signaling Pathway</a>                                                                                  | 0.0001425 |
| 166 | h_tercPathway         | <a href="#">Overview of telomerase RNA component gene hTerc Transcriptional Regulation</a>                               | 0.0001745 |
| 167 | h_ephA4Pathway        | <a href="#">Eph Kinases and ephrins support platelet aggregation</a>                                                     | 0.0002158 |
| 168 | h_asbcellPathway      | <a href="#">Antigen Dependent B Cell Activation</a>                                                                      | 0.0003102 |
| 169 | h_bbcellPathway       | <a href="#">Bystander B Cell Activation</a>                                                                              | 0.0003102 |
| 170 | h_pparPathway         | <a href="#">Basic mechanism of action of PPARa, PPARb(d) and PPARg and effects on gene expression</a>                    | 0.0003166 |
| 171 | h_compPathway         | <a href="#">Complement Pathway</a>                                                                                       | 0.0003325 |
| 172 | h_myosinPathway       | <a href="#">PKC-catalyzed phosphorylation of inhibitory phosphoprotein of myosin phosphatase</a>                         | 0.0003334 |
| 173 | h_spryPathway         | <a href="#">Sprouty regulation of tyrosine kinase signals</a>                                                            | 0.0003356 |
| 174 | h_s1pPathway          | <a href="#">SREBP control of lipid synthesis</a>                                                                         | 0.0003403 |
| 175 | h_dreampathway        | <a href="#">Repression of Pain Sensation by the Transcriptional Regulator DREAM</a>                                      | 0.000343  |
| 176 | h_iresPathway         | <a href="#">Internal Ribosome entry pathway</a>                                                                          | 0.0003444 |
| 177 | h_egfr_smrtePathway   | <a href="#">Map Kinase Inactivation of SMRT Corepressor</a>                                                              | 0.0003688 |
| 178 | h_sam68Pathway        | <a href="#">Regulation of Splicing through Sam68</a>                                                                     | 0.0003819 |
| 179 | h_vobesityPathway     | <a href="#">Visceral Fat Deposits and the Metabolic Syndrome</a>                                                         | 0.0003925 |
| 180 | h_chemicalPathway     | <a href="#">Apoptotic Signaling in Response to DNA Damage</a>                                                            | 0.0005135 |
| 181 | h_stat3Pathway        | <a href="#">Stat3 Signaling Pathway</a>                                                                                  | 0.0005499 |
| 182 | h_plcPathway          | <a href="#">Phospholipase C Signaling Pathway</a>                                                                        | 0.0005541 |
| 183 | h_agrPathway          | <a href="#">Agrin in Postsynaptic Differentiation</a>                                                                    | 0.0005628 |
| 184 | h_atmPathway          | <a href="#">ATM Signaling Pathway</a>                                                                                    | 0.0006065 |
| 185 | h_dcPathway           | <a href="#">Dendritic cells in regulating TH1 and TH2 Development</a>                                                    | 0.0006583 |
| 186 | h_igf1Pathway         | <a href="#">IGF-1 Signaling Pathway</a>                                                                                  | 0.0007213 |
| 187 | h_plk3Pathway         | <a href="#">Regulation of cell cycle progression by Plk3</a>                                                             | 0.0007266 |
| 188 | h_smPathway           | <a href="#">Spliceosomal Assembly</a>                                                                                    | 0.0009198 |
| 189 | h_ptenPathway         | <a href="#">PTEN dependent cell cycle arrest and apoptosis</a>                                                           | 0.0009466 |
| 190 | h_atrbrcaPathway      | <a href="#">Role of BRCA1, BRCA2 and ATR in Cancer Susceptibility</a>                                                    | 0.0009696 |
| 191 | h_actinYPathway       | <a href="#">Y branching of actin filaments</a>                                                                           | 0.0009827 |
| 192 | h_cdc42racPathway     | <a href="#">Role of PI3K subunit p85 in regulation of Actin Organization and Cell Migration</a>                          | 0.0010103 |
| 193 | h_alternativePathway  | <a href="#">Alternative Complement Pathway</a>                                                                           | 0.001019  |
| 194 | h_CSKPathway          | <a href="#">Activation of Csk by cAMP-dependent Protein Kinase Inhibits Signaling through the T Cell Receptor</a>        | 0.0015016 |
| 195 | h_At1rPathway         | <a href="#">Angiotensin II mediated activation of JNK Pathway via Pyk2 dependent signaling</a>                           | 0.0015491 |
| 196 | h_il5Pathway          | <a href="#">IL 5 Signaling Pathway</a>                                                                                   | 0.0015821 |
| 197 | h_gcrPathway          | <a href="#">Corticosteroids and cardioprotection</a>                                                                     | 0.001719  |
| 198 | h_hsp27Pathway        | <a href="#">Stress Induction of HSP Regulation</a>                                                                       | 0.0018028 |
| 199 | h_granulocytesPathway | <a href="#">Adhesion and Diapedesis of Granulocytes</a>                                                                  | 0.0018588 |
| 200 | h_tob1Pathway         | <a href="#">Role of Tob in T-cell activation</a>                                                                         | 0.001871  |
| 201 | h_pepiPathway         | <a href="#">Proepithelin Conversion to Epithelin and Wound Repair Control</a>                                            | 0.0019212 |
| 202 | h_igf1mtorpathway     | <a href="#">Skeletal muscle hypertrophy is regulated via AKT/mTOR pathway</a>                                            | 0.0019464 |
| 203 | h_tcrPathway          | <a href="#">T Cell Receptor Signaling Pathway</a>                                                                        | 0.0025311 |

|     |                      |                                                                                             |           |
|-----|----------------------|---------------------------------------------------------------------------------------------|-----------|
| 204 | h_TPOPathway         | <a href="#">TPO Signaling Pathway</a>                                                       | 0.0025358 |
| 205 | h_arfPathway         | <a href="#">Tumor Suppressor Arf Inhibits Ribosomal Biogenesis</a>                          | 0.0026546 |
| 206 | h_rankIPathway       | <a href="#">Bone Remodelling</a>                                                            | 0.002829  |
| 207 | h_ctla4Pathway       | <a href="#">The Co-Stimulatory Signal During T-cell Activation</a>                          | 0.0028418 |
| 208 | h_setPathway         | <a href="#">Granzyme A mediated Apoptosis Pathway</a>                                       | 0.0028832 |
| 209 | h_plateletAppPathway | <a href="#">Platelet Amyloid Precursor Protein Pathway</a>                                  | 0.0028898 |
| 210 | h_malPathway         | <a href="#">Role of MAL in Rho-Mediated Activation of SRF</a>                               | 0.0034369 |
| 211 | h_reckPathway        | <a href="#">Inhibition of Matrix Metalloproteinases</a>                                     | 0.0035269 |
| 212 | h_p27Pathway         | <a href="#">Regulation of p27 Phosphorylation during Cell Cycle Progression</a>             | 0.0037042 |
| 213 | h_GrupaicPathway     | <a href="#">Grupaical Complement Pathway</a>                                                | 0.0037152 |
| 214 | h_bard1Pathway       | <a href="#">BRCA1-dependent Ub-ligase activity</a>                                          | 0.0037503 |
| 215 | h_ecmPathway         | <a href="#">Erk and PI-3 Kinase Are Necessary for Collagen Binding in Corneal Epithelia</a> | 0.0038796 |
| 216 | h_ctlPathway         | <a href="#">CTL mediated immune response against target cells</a>                           | 0.0040321 |
| 217 | h_aMANpathway        | <a href="#">Steps in the Glycosylation of Mammalian N-linked Oligosaccharides</a>           | 0.0047155 |

**3. Signaling pathways** (according to Biocarta repository) with significantly changed gene expression between ovarian cancers of distinct histology. Least square (LS) and Kolomogorov-Smirnoff tests (KS) were used to analyze annotated genes selected by ANOVA in comparison of 4 histological types of ovarian cancer.

|    | <b>Signalling pathways (Biocarta)</b> | <b>Signalling pathway name</b>                                                               | <b>p-value LS</b> | <b>p-value KS</b> |
|----|---------------------------------------|----------------------------------------------------------------------------------------------|-------------------|-------------------|
| 1  | h_mta3Pathway                         | <a href="#">Downregulated of MTA-3 in ER-negative Breast Tumors</a>                          | 1e-05             | 0.0064106         |
| 2  | h_nuclearRsPathway                    | <a href="#">Nuclear Receptors in Lipid Metabolism and Toxicity</a>                           | 1e-05             | 0.0293894         |
| 3  | h_mrpPathway                          | <a href="#">Multi-Drug Resistance Factors</a>                                                | 0.0003728         | 0.0975121         |
| 4  | h_HivnefPathway                       | <a href="#">HIV-I Nef: negative effector of Fas and TNF</a>                                  | 0.0008438         | 0.0433122         |
| 5  | h_extrinsicPathway                    | <a href="#">Extrinsic Prothrombin Activation Pathway</a>                                     | 0.0012624         | 0.1416955         |
| 6  | h_EfpPathway                          | <a href="#">Estrogen-responsive protein Efp controls cell cycle and breast tumors growth</a> | 0.0017387         | 0.0048034         |
| 7  | h_amiPathway                          | <a href="#">Acute Myocardial Infarction</a>                                                  | 0.0022952         | 0.1734852         |
| 8  | h_prionPathway                        | <a href="#">Prion Pathway</a>                                                                | 0.0030394         | 0.1665524         |
| 9  | h_deathPathway                        | <a href="#">Induction of apoptosis through DR3 and DR4/5 Death Receptors</a>                 | 0.0044739         | 0.3308774         |
| 10 | h_il2rbPathway                        | <a href="#">IL-2 Receptor Beta Chain in T cell Activation</a>                                | 0.004894          | 0.0003221         |
| 11 | h_AcetaminophenPathway                | <a href="#">Mechanism of Acetaminophen Activity and Toxicity</a>                             | 0.0285458         | 0.003447          |
