# Supplementary material
Source: Frontiers journal article supplement (https://www.frontiersin.org/articles/61993)
Supplement: Data_Sheet_5.PDF [file Data_Sheet_5.PDF]

## FIGO stage

**1. Hierarchical clustering:** Dendrogram shows the relations between ovarian cancer samples of different FIGO stages. Heat map shows relative intensity of genes expression. FIGO II samples are clustered together and show distinct gene expression pattern. FIGO III and FIGO IV samples are mixed together and do not show distinct gene expression pattern.

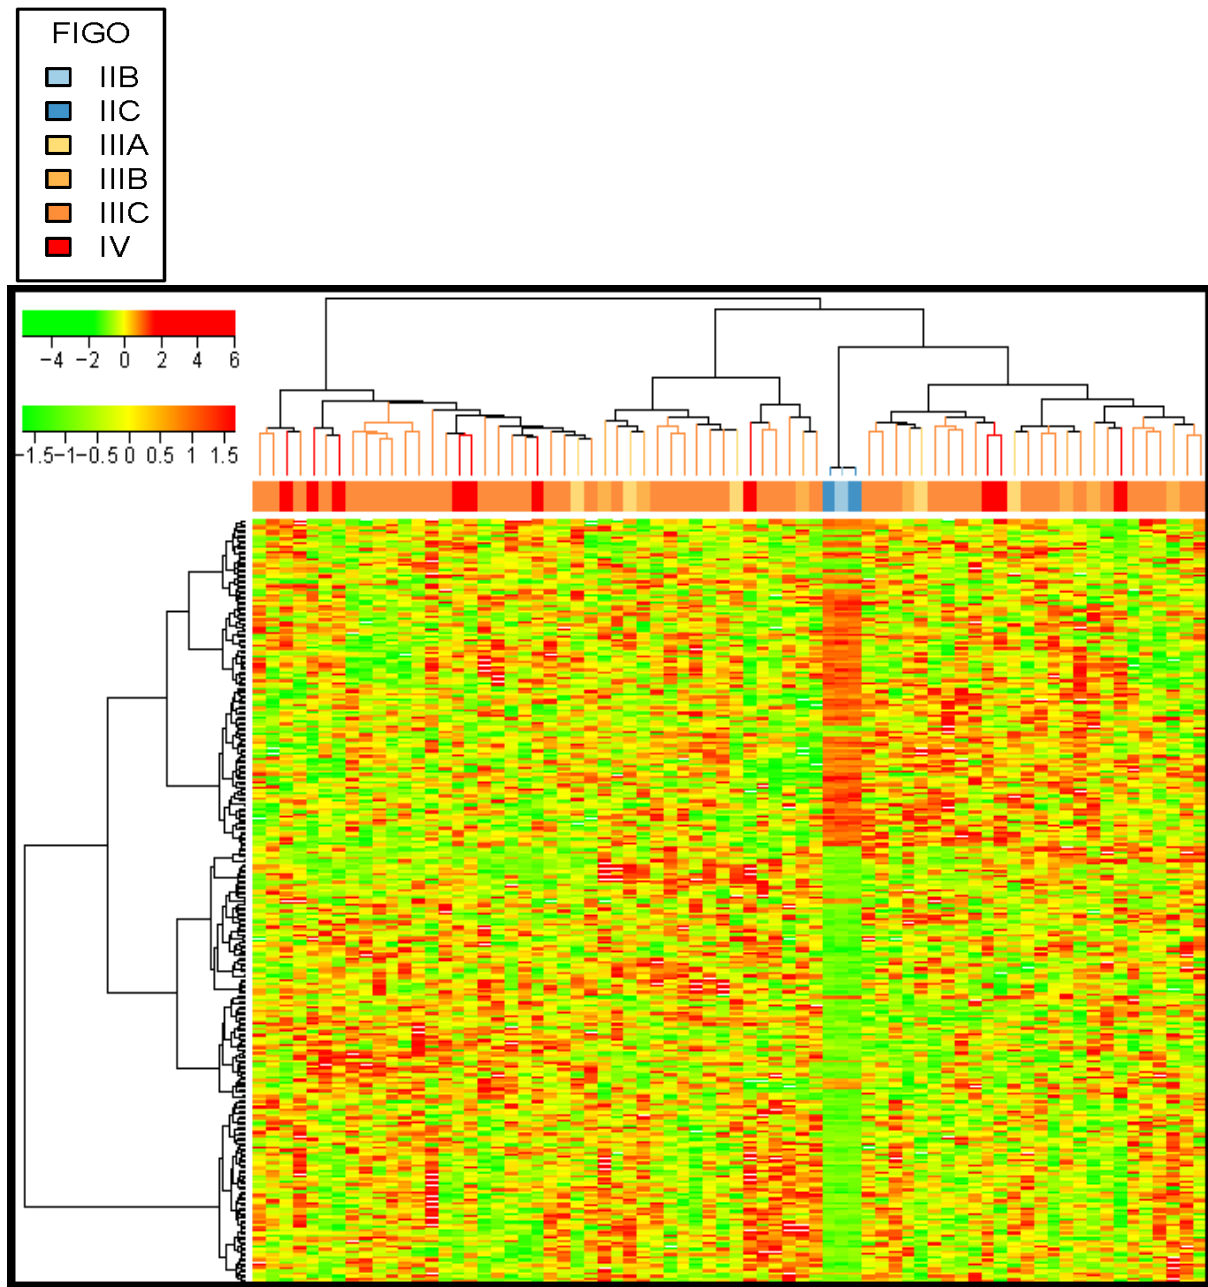

**2. Gene Ontology analysis** was performed using annotated genes selected in Welch ( $p < 0.001$ ) for the difference between FIGO II versus FIGO III/IV stages of ovarian cancer.

| Gene Ontology class                                                | p-value |
|--------------------------------------------------------------------|---------|
| GO:45830: positive regulation of isotype switching                 | 0.00322 |
| GO:48298: positive regulation of isotype switching to IgA isotypes | 0.00322 |
| GO:48296: regulation of isotype switching to IgA isotypes          | 0.00322 |
| GO:48290: isotype switching to IgA isotypes                        | 0.00322 |
| GO:7159: leukocyte adhesion                                        | 0.0047  |
| GO:50871: positive regulation of B cell activation                 | 0.00543 |

|                                           |         |
|-------------------------------------------|---------|
| GO:45444: fat cell differentiation        | 0.00635 |
| GO:45191: regulation of isotype switching | 0.00815 |
| GO:9405: pathogenesis                     | 0.00829 |
| GO:7218: neuropeptide signaling pathway   | 0.00841 |
| GO:51606: detection of stimulus           | 0.00932 |
| GO:9582: detection of abiotic stimulus    | 0.00934 |
| GO:45190: isotype switching               | 0.0097  |
| GO:1504: neurotransmitter uptake          | 0.0097  |

**3. Signaling pathways** (according to Biocarta repository) with significantly changed gene expression between FIGO II versus FIGO III/IV stages of ovarian cancer. Least square (LS) and Kolomogorov-Smirnoff (KS) tests were used for analysis of annotated genes selected in Welch ( $p < 0.001$ ) for the difference between FIGO II versus FIGO III/IV stages.

|    | Signaling pathways (Biocarta) | Signaling pathway name                                                                                | p-value LS | p-value KS |
|----|-------------------------------|-------------------------------------------------------------------------------------------------------|------------|------------|
| 1  | h_AcetaminophenPathway        | <a href="#">Mechanism of Acetaminophen Activity and Toxicity</a>                                      | 1e-05      | 1e-05      |
| 2  | h_eicosanoidPathway           | <a href="#">Eicosanoid Metabolism</a>                                                                 | 1e-05      | 0.047444   |
| 3  | h_sppaPathway                 | <a href="#">Aspirin Blocks Signaling Pathway Involved in Platelet Activation</a>                      | 0.0003494  | 0.0246272  |
| 4  | h_bArrestinPathway            | <a href="#">β-arrestins in GPCR Desensitization</a>                                                   | 0.0019733  | 0.0048259  |
| 5  | h_tnfr1Pathway                | <a href="#">TNFR1 Signaling Pathway</a>                                                               | 0.0036629  | 0.095826   |
| 6  | h_prionPathway                | <a href="#">Prion Pathway</a>                                                                         | 0.0044454  | 0.0157053  |
| 7  | h_deathPathway                | <a href="#">Induction of apoptosis through DR3 and DR4/5 Death Receptors</a>                          | 0.0045902  | 0.1032272  |
| 8  | h_pparPathway                 | <a href="#">Basic mechanism of action of PPARα, PPARβ(d) and PPARγ and effects on gene expression</a> | 0.0051896  | 0.0003989  |
| 9  | h_plcdPathway                 | <a href="#">Phospholipase C d1 in phospholipid associated cell signaling</a>                          | 0.0109403  | 9.18e-05   |
| 10 | h_pkcPathway                  | <a href="#">Activation of PKC through G protein coupled receptor</a>                                  | 0.0140429  | 0.0004615  |
| 11 | h_tollPathway                 | <a href="#">Toll-Like Receptor Pathway</a>                                                            | 0.0163908  | 0.0021563  |
| 12 | h_rnaPathway                  | <a href="#">Double Stranded RNA Induced Gene Expression</a>                                           | 0.0359068  | 0.0025545  |
| 13 | h_iresPathway                 | <a href="#">Internal Ribosome entry pathway</a>                                                       | 0.03749    | 0.0027449  |
| 14 | h_myosinPathway               | <a href="#">PKC-catalyzed phosphorylation of inhibitory phosphoprotein of myosin phosphatase</a>      | 0.0427414  | 0.0030922  |
| 15 | h_pitx2Pathway                | <a href="#">Multi-step Regulation of Transcription by Pitx2</a>                                       | 0.0944048  | 0.0044654  |
| 16 | h_alkPathway                  | <a href="#">ALK in cardiac myocytes</a>                                                               | 0.1153683  | 0.0028702  |

**4. Signaling pathways** (according to Biocarta repository) with significantly changed gene expression between FIGO II versus FIGO III/IV stages of ovarian cancer.

Least square (LS) and Kolomogorov-Smirnoff (KS) tests were used for analysis of annotated genes selected in Welch test ( $p < 0.001$ ) for the difference between FIGO II versus FIGO III/IV stages.

|   | Signaling pathways (Biocarta) | Signaling pathway name                                                                       | p-value   |
|---|-------------------------------|----------------------------------------------------------------------------------------------|-----------|
| 1 | h_AcetaminophenPathway        | <a href="#">Mechanism of Acetaminophen Activity and Toxicity</a>                             | 0.0006335 |
| 2 | h_bArrestinPathway            | <a href="#">β-arrestins in GPCR Desensitization</a>                                          | 0.0021596 |
| 3 | h_sppaPathway                 | <a href="#">Aspirin Blocks Signaling Pathway Involved in Platelet Activation</a>             | 0.0044041 |
| 4 | h_akap13Pathway               | <a href="#">Rho-Selective Guanine Exchange Factor AKAP13 Mediates Stress Fiber Formation</a> | 0.0048097 |
