# Supplementary material
Source: Frontiers journal article supplement (https://www.frontiersin.org/articles/61993)
Supplement: Data_Sheet_11.PDF [file Data_Sheet_11.PDF]

## Response to chemotherapy

**1. Hierarchical clustering:** Dendrogram shows the relations between tumor samples from patients with different response to chemotherapy. Heat map shows relative intensity of genes expression. Interestingly, samples from patients with stable disease (SD) and progression (P) are clustered together and show homogenous gene expression pattern, distinct from samples from patients with complete response (CR) or partial response (PR).

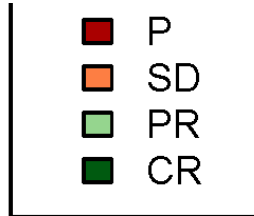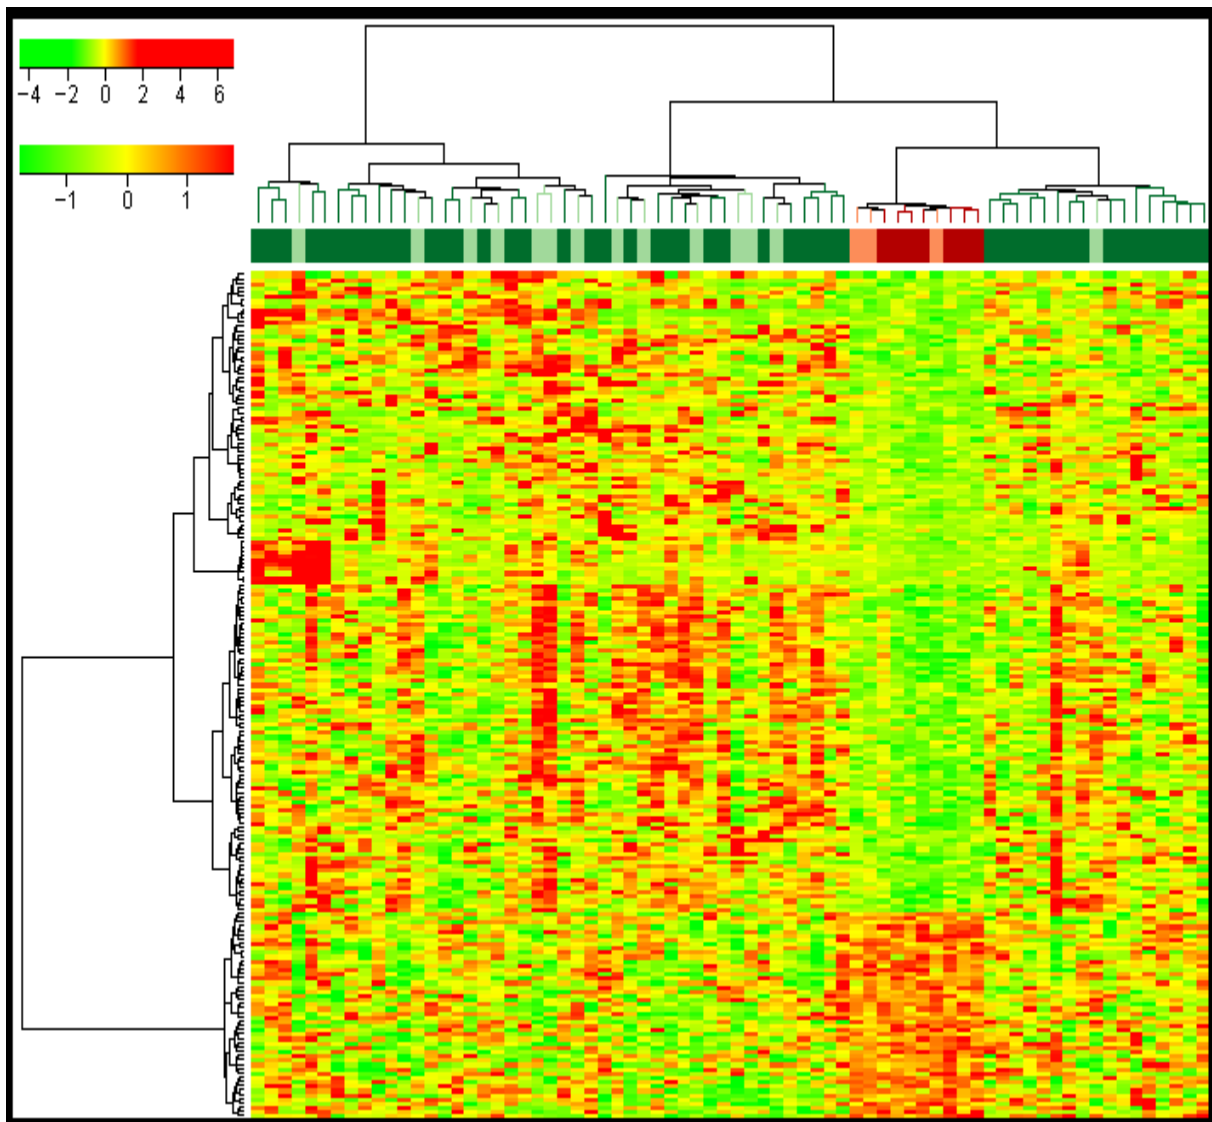

**2. Gene Ontology analysis** was performed using annotated genes selected in Welch test ( $p < 0.001$ ) for the difference between CR+PR versus SD+P tumors.

| Gene Ontology class                              | p-value |
|--------------------------------------------------|---------|
| GO:7402: ganglion mother cell fate determination | 0.0061  |
| GO:51327: M phase of meiotic cell cycle          | 0.00686 |
| GO:7126: meiosis                                 | 0.00686 |

|                                     |         |
|-------------------------------------|---------|
| GO:51321: meiotic cell cycle        | 0.00686 |
| GO:7631: feeding behavior           | 0.00515 |
| GO:7222: frizzled signaling pathway | 0.00876 |

**3. Signaling pathways** (according to Biocarta repository) with significantly changed gene expression between CR+PR versus SD+P tumors. Least square (LS) and Kolomogorov-Smirnoff (KS) tests were used for analysis of annotated genes selected in Welch ( $p < 0.001$ ) for the difference between CR+PR versus SD+P tumors.

|   | Signaling pathways (Biocarta) | Signaling pathway name                                                  | p-value LS | p-value KS |
|---|-------------------------------|-------------------------------------------------------------------------|------------|------------|
| 1 | h_cellcyclePathway            | <a href="#">Cyclins and Cell Cycle Regulation</a>                       | 0.0034352  | 0.0664212  |
| 2 | h_botulinPathway              | <a href="#">Blockade of Neurotransmitter Release by Botulinum Toxin</a> | 0.0088157  | 0.0001285  |
